# Supplementary material for: Inhibition of RAGE Attenuates Cigarette Smoke-Induced Lung Epithelial Cell Damage via RAGE-Mediated Nrf2/DAMP Signaling
Source: PubMed Central journal article supplement (PMC6036614; doi:10.3389/fphar.2018.00684), 2018-07-02
Supplement: Data_Sheet_1.pdf [file Data_Sheet_1.pdf]

**Data Supplement**

**Inhibition of RAGE attenuates cigarette smoke-induced lung epithelial cell damage via RAGE-mediated Nrf2/DAMP signaling**

Hanbyeol Lee<sup>1</sup>, Jooyeon Lee<sup>1</sup>, Seok-Ho Hong<sup>2</sup>, Irfan Rahman<sup>3</sup>, Se-Ran Yang<sup>1,\*</sup>

<sup>1</sup>Department of Thoracic and Cardiovascular Surgery, <sup>2</sup>Department of Internal Medicine, Kangwon National University, 1 Kangwondaehak-gil, Chuncheon, Gangwon 200-701, Republic of Korea, <sup>3</sup>Department of Environmental Medicine, University of Rochester Medical Center, Rochester, NY

Supplementary files

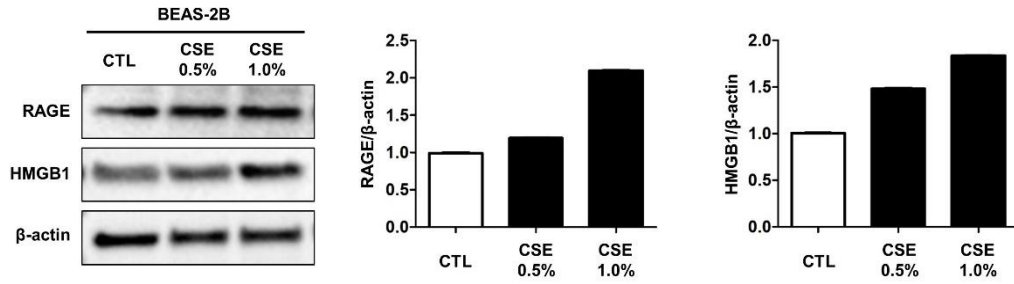

**Supplementary Figure 1.** The RAGE and HMGB1 were determined by western blotting in 0.5% and 1.0% CSE-exposed BEAS-2B for 24h. Equal protein loading amounts were proved by  $\beta$ -actin. The corresponding density ratio was determined using Image J. CTL, no treatment.

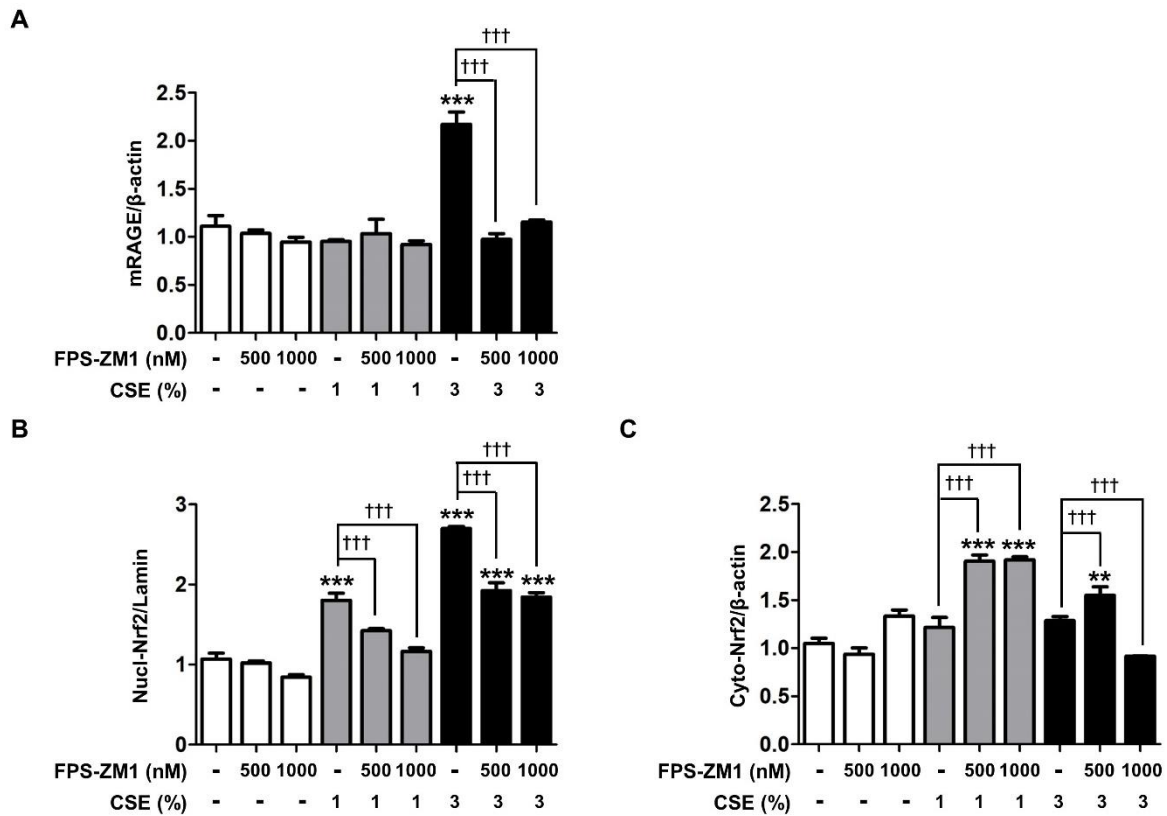

**Supplementary Figure 2.** A549 cells were treated with CSE in presence of FPS-ZM1 for 8h. The Lamin A/C and  $\beta$ -actin were used for loading control of the nuclear protein and cytoplasmic protein, respectively. Values are presented as the mean  $\pm$ SE of three independent experiments performed in triplicate. CTL, no treatment; n.s, not significant. \*\*\* $p < 0.001$  vs. CTL; ††† $p < 0.001$  vs. 1% CSE treatment; ‡‡‡ $p < 0.001$  vs. 3% CSE treatment. CTL: control.

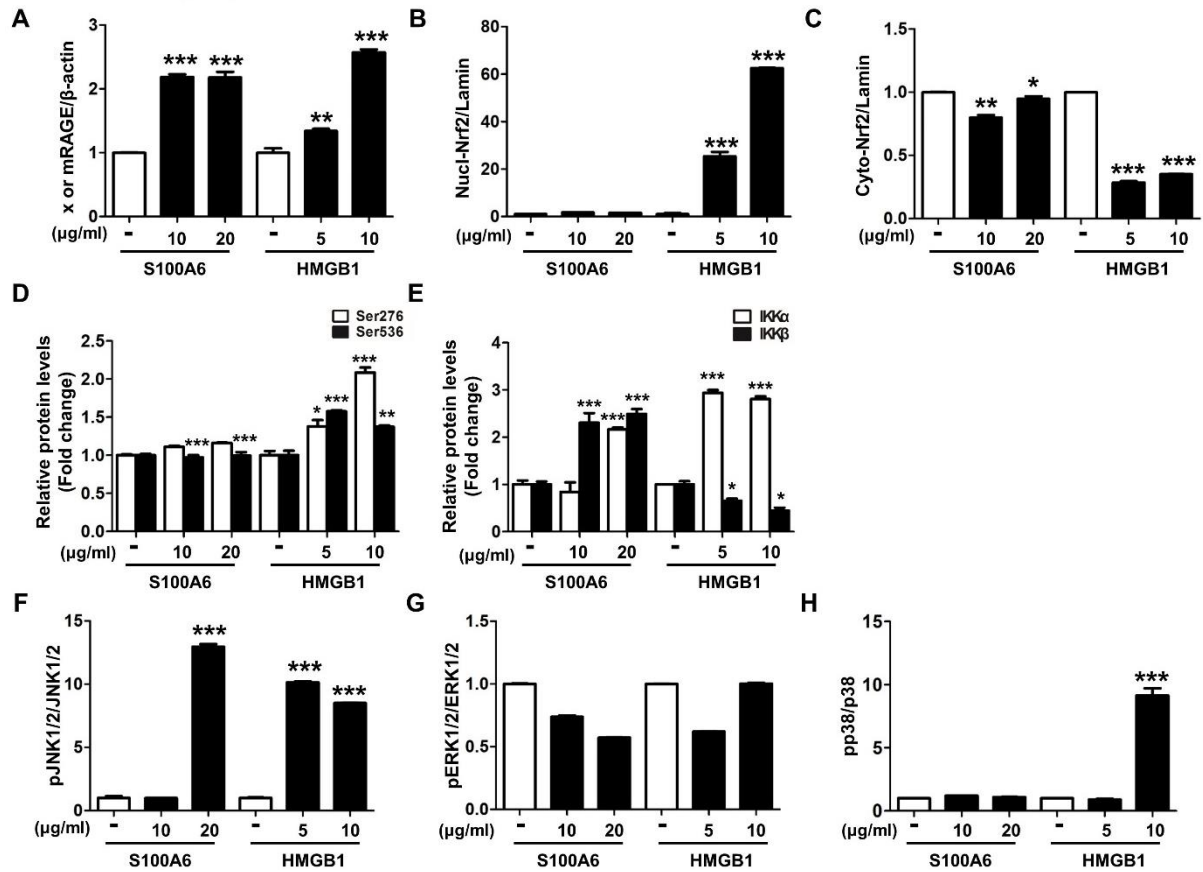

**Supplementary Figure 3.** A549 cells were treated with S100A6 (10 and 20µg/ml) and HMGB1 (5 and 10 µg/ml) for protein expression of DAMP signaling. The Lamin A/C and  $\beta$ -actin were used for loading control of the nuclear protein and cytoplasmic protein, respectively. Values are presented as the mean  $\pm$ SE of three independent experiments performed in triplicate. CTL, no treatment; n.s, not significant. \* $p < 0.05$  and \*\*\* $p < 0.001$  vs. no treatment
